# The Great Genotyper: A Graph-Based Method for Population Genotyping of Small and Structural Variants

Moustafa Shokrof<sup>1,2</sup>

Mohamed Abuelanin<sup>1,2</sup>  
Tamer A. Mansour<sup>1,3</sup>

C. Titus Brown<sup>1</sup>

<sup>1</sup> Department of Population Health and Reproduction, School of Veterinary Medicine, University of California, Davis, CA, USA

<sup>2</sup> Computer Science Graduate Group, University of California, Davis, CA, USA

<sup>3</sup> Department of Clinical Pathology, School of Medicine, Mansoura University, Mansoura, Egypt  
June 24, 2024

## 1 Abstract

Long-read sequencing (LRS) enables variant calling of high-quality structural variants (SVs). Genotypers of SVs utilize these precise call sets to increase the recall and precision of genotyping in short-read sequencing (SRS) samples. With the extensive growth in availability of SRS datasets in recent years, we should be able to calculate accurate population allele frequencies of SV. However, reprocessing hundreds of terabytes of raw SRS data to genotype new variants is impractical for population-scale studies, a computational challenge known as the N+1 problem. Solving this computational bottleneck is necessary to analyze new SVs from the growing number of pangenomes in many species, public genomic databases, and pathogenic variant discovery studies.

To address the N+1 problem, we propose The Great Genotyper, a population genotyping workflow. Applied to a human dataset, the workflow begins by preprocessing 4.2K short-read samples of a total of 183TB raw data to create an 867GB Counting Colored De Bruijn Graph (CCDG). The Great Genotyper uses this CCDG to genotype a list of phased or unphased variants, leveraging the CCDG population information to increase both precision and recall. The Great Genotyper offers the same accuracy as the state-of-the-art genotypers with the addition of unprecedented performance. It took 100 hours to genotype 4.5M variants in the 4.2K samples using one server with 32 cores and 145GB of memory. A similar task would take months or even years using single-sample genotypers.

The Great Genotyper opens the door to new ways to study SVs. We demonstrate its application in finding pathogenic variants by calculating accurate allele frequency for novel SVs. Also, a premade index is used to create a 4K reference panel by genotyping variants from the Human Pangenome Reference Consortium (HPRC). The new reference panel allows for SV imputation from genotyping microarrays. Moreover, we genotype the GWAS catalog and merge its variants with the 4K reference panel. We show 6.2K events of high linkage between the HPRC's SVs and nearby GWAS SNPs, which can help in interpreting the effect of these SVs on gene functions. This analysis uncovers the detailed haplotype structure of the human fibrinogen locus and revives the pathogenic association of a 28 bp insertion in the FGA gene with thromboembolic disorders.

## 2 Introduction

Maya Angelou eloquently stated, "In diversity, there is beauty and there is strength." This principle is particularly relevant to genomics studies, emphasizing the importance of exploring genetic diversity across large cohorts and

36 populations. Such research is crucial for advancing our understanding of evolution [1, 2], genetic adaptations [3],  
37 and gene-disease associations [4, 5]. Genetic diversity originates from various mutations, including single nucleotide  
38 variants (SNVs), small insertions and deletions (less than 50 base pairs), and structural variants (greater than  
39 50 base pairs). Notably, structural variants (SVs) enhance genomic diversity fifteen times more than SNVs [6]  
40 and significantly affect gene function [7]. However, SVs are understudied compared to smaller variants due to the  
41 limitations of short-read sequencing (SRS), which often yields high false positive rates and inconsistent recall, varying  
42 from 10% to 70% [8]. In contrast, long-read sequencing (LRS) provides more reliable precision and recall rates [8] and  
43 is used in both mapping [9, 10, 11] and assembly-based approaches [12], the latter of which helps mitigate mapping  
44 biases to a linear genome reference. Despite its advantages, LRS remains prohibitively expensive for comprehensive  
45 population-scale analysis, and the volume of LRS data available still pales in comparison to that of SRS. As a result,  
46 there is a pressing need to develop computational techniques that utilize the precise variant discovery capabilities of  
47 LRS while maximizing the extensive data produced by SRS.

48 To address the shortcomings of SV callers from short-read sequencing, specialized genotypers analyze the presence  
49 and genotype of SVs, whether identified through variant calling from SRS or LRS, in SRS samples [13, 14, 15, 16, 17].  
50 Tools such as Paragraph [14] and GraphTyper2 [16] realign reads to a variation-aware graph, minimizing mapping  
51 bias and determining genotypes from this realignment. Pangenie [17] uses k-mers specific to all potential alleles to  
52 genotype phased variants from pangenomes, minimizing mapping bias. Furthermore, Pangenie integrates genotyping  
53 and imputation, utilizing the phasing information from the pangenome to infer genotypes in regions lacking coverage,  
54 thereby achieving superior performance compared to other SV genotypers. Unlike these single-sample genotypers,  
55 muCNV utilizes population data to refine genotyping by modeling read mapping statistics across multiple samples,  
56 enhancing genotyping accuracy [15].

57 SV genotypers generally achieve higher recall and precision compared to direct variant calling in SRS samples.  
58 For instance, Huddleston et al. [18] used LRS to analyze SVs in two human genomes and found that 90% of these  
59 SVs were missing in the 1000 Genomes call set, yet 61% could still be genotyped using SRS. Recent population-  
60 scale studies have therefore adopted a combined approach of variant calling and genotyping: initially, variants are  
61 identified from a few LRS samples or numerous SRS samples, and then the identified SVs are merged and genotyped  
62 in a larger SRS cohort [19]. For instance, Kirsche et al. [20] used Paragraph [14] to genotype variants from 31  
63 LRS samples in a cohort of 1.3k SRS samples from the 1000 Genome Project (1kGP) [21]. Similarly, GraphTyper2  
64 was employed to build graphs from SVs detected in 50k Icelandic SRS samples [16] or 2k dog SRS samples [22],  
65 which were then re-genotyped using the same SRS samples to improve recall. With the same concept in mind, the  
66 Human Pangenome Reference Consortium (HPRC) [23] applied Pangenie to genotype the pangenome variants in  
67 3.2k SRS samples from 1kGP [21]. Similarly, Goo Jun et al. [59] used MuCNV to jointly genotype TopMed SVs  
68 in 139k SRS samples. These genotypers enable large-scale population genotyping of gene catalogs, pangenomes, and  
69 candidate disease-associating variants.

70 The current SV genotypers, while fast and scalable, face significant challenges at the population level. These  
71 genotypers require downloading and reprocessing all the raw SRS data to genotype even a single new variant, a  
72 demand that is increasingly impractical. This issue exemplifies a computational challenge known as the N+1 problem  
73 [67]. In today's era of extensive sequencing, new lists of variants emerge daily, and a reliable estimation of their allele  
74 frequencies is important for interpretation. For instance, the number of pangenomes for humans [23, 24] as well as  
75 numerous other species [25, 26, 27, 28] is increasing. Similarly, databases like dbVar [29], genomeAD [60], TopMed  
76 [30], and ClinVar [31] are constantly expanding their variant collections. The N+1 challenge also affects disease  
77 gene discovery studies in probands [32]. LRS can produce phased, high-quality SVs, and identifying pathogenic  
78 variants involves filtering out common variants and focusing on rare ones. However, matching these variants in  
79 public databases poses challenges, and the reliability of allele frequencies in SV catalogs is dubious when calculated  
80 in small or distinct subpopulations or when using methods with low recall. Therefore, solving this computational  
81 bottleneck is crucial to optimize the usage of genomic data for advancing precision medicine and enhancing our  
82 understanding of genetic diversity.

83 We therefore introduce “The Great Genotyper,” an alignment-free population genotyping pipeline for both struc-

tural and small variants. This pipeline can accurately genotype four thousand human WGS samples in just hours, bypassing the need for 183TB of raw sequence data. Instead, it utilizes an 867GB Counting Colored Debruijn Graph (CCDG), which is constructed once from the population’s raw sequences by extracting k-mers and their counts. The CCDG provides a viable solution to the N+1 problem as it can be reused to genotype any new variant list for this population. In addition, it utilizes population-derived information to improve the quality of genotyping, creating an imputation panel for SVs using a pangenome, and annotating SVs by their linkage to nearby GWAS SNPs.

## 3 Result

### 3.1 The Great Genotyper: A Workflow for Genotyping Small and Structural Variants in Thousands of Short-Read Samples

The Great Genotyper solves the N+1 problem by deploying two independent workflows. The first is an indexing workflow that creates a CCDG using SRS to represent the population (Figure 1A). Once created, the CCDG can be reused by a population genotyping workflow (Figure 1B) to genotype a pangenome, phased variants, or unphased variants in the cohort of SRS samples.

For human populations, we download 4.2K high-coverage (30x) whole genome sequencing (WGS) samples from three projects: 1KGP [21], HGDP [33], and SGDP [34]. This data represents 140 populations worldwide (Figure 1A and Supplementary Figure 1). While CCDGs are much smaller than raw sequences, creating a single CCDG for thousands of samples would result in a complex and memory-intensive structure. Therefore, the indexing workflow partitions closely related samples into separate groups, creating individual CCDGs for each (Figure 1A.2). This workflow starts by downsampling raw sequences into representative summaries (i.e. FracMinHash sketches calculated by sourmash [66]). These sketches are used for quality control including estimate calculation of sequencing depth, genome coverage, possible contamination, and sex prediction [61]. For example, this analysis reveals samples with unexpectedly low coverage of the human genome as well as four discrepancies from the sex provided in the metadata (Supplementary Figures 2 and 3). After that, a pairwise comparison of sourmash signatures enables the creation of a dendrogram (Figure 1A.2). Based on this dendrogram, 29 partitions of closely related samples are identified (Figure 1A.3). Finally, Metagraph [62] is used to create a CCDG for each partition, resulting in individual files ranging from 16-68 GB with a total size of 867 GB.

Building upon the CCDGs created in the indexing workflow, the genotyping workflow (Figure 1B) empowers the analysis of any variant list across all samples without requiring raw reads or mapping. It begins with three key inputs: a list of pre-generated CCDGs, a reference genome and a variant list (phased or unphased). Depending on needs, three different workflows can be chosen: A) k-mer-based workflow: Efficiently genotypes unphased variants. B) Hidden Markov model (HMM) workflow: Handles both genotyping and imputation for phased variants. C) Two-pass workflow: Genotypes and imputes unphased variants, leveraging population information to determine their phase and impute missing data.

Both the k-mer-based and HMM workflows start by extracting k-mers unique to the variant regions and querying their count data for all samples within the CCDGs (Figure 1B). The k-mer-based workflow determines initial genotypes by comparing the counts of unique k-mers to the average sample coverage for each sample. This identifies variants present in each sample without relying on phasing information. In contrast, the HMM workflow tackles phased variants by genotyping and imputing them using the Hidden Markov Model (HMM) implemented in Pangenie [17]. This enables the imputation of genotypes in regions with low coverage or complexity. Following initial genotyping, both workflows undergo a two-step refinement. The first step is to filter low-quality genotypes after comparing the genotype qualities for each variant across all samples. The second step utilizes Beagle [35, 36] to statistically impute low-confidence genotypes and phase the resulting variants.

The third workflow is a pipeline to genotype and impute unphased variants. It starts by running the k-mer-based workflow to create a reference panel using the input variants and samples in the CCDGs. This reference panel is

128 then used to phase the input variants. After that, the HMM workflow is employed on the phased variants to obtain  
129 more precise genotypes in indexed population.

### 130 **3.2 Achieving Population Genotyping in a Matter of Hours with no Decrease in** 131 **Accuracy**

132 The performance of the Great Genotyper was evaluated for the k-mer-based workflow (for unphased variants) and  
133 HMM workflow (for phased variants). The Great Genotyper could genotype 4.5 million variants across 4.2K WGS  
134 samples in approximately 100 hours, utilizing 32 cores and 145 GB of memory, as depicted in Figure 2A. To put  
135 this performance into context, Pangenie and GraphTyper2 required nearly an hour and 12 hours, respectively, to  
136 genotype the same 4.5 million variants in a single sample using the same machine. Extrapolating this duration,  
137 Pangenie would take approximately six months to complete genotyping of the same dataset, while GraphTyper2  
138 needs six years to finish. This underscores the efficiency of the Great Genotyper in both operational modes.

139 For benchmarking of precision and recall of the Great Genotyper with other state-of-the-art genotypers, we  
140 genotyped SVs and small variants derived from the NA12878 haploid-resolved assemblies using the 30x SRS of  
141 HG00731 (See Methods and Supplementary Figure 4 for the design of benchmarking and Figure 2 for the detailed  
142 results).

143 The Great Genotyper's HMM and Pangenie exhibit superior F-scores for phased SVs, achieving 0.91 in non-  
144 repetitive regions. Paragraph and the k-mer-based workflow follow closely with F-scores of 0.88 and 0.87 for unphased  
145 SVs. Intriguingly, the two-pass workflow accurately predicts the phasing information, boosting the F-score back to  
146 0.91. In contrast, GraphTyper trails with an F-score of 0.80. The challenges increase in repetitive regions, where  
147 variability in results is more pronounced. Here, Pangenie and the HMM workflow score 0.63 and 0.61, respectively,  
148 followed by Paragraph and the k-mer-based workflow at 0.55. However, the two-pass workflow enhances the k-mer-  
149 based approach's F-score to 0.6, while GraphTyper lags with an F-score of 0.48.

150 For small variants, GATK leads, achieving F-scores of 0.97 and 0.70 in non-repetitive and repetitive regions,  
151 respectively. The Great Genotyper's HMM and Pangenie are close behind with F-scores of 0.95 in non-repetitive  
152 areas. The k-mer-based workflow scores 0.93, improving slightly to 0.94 with the two-pass workflow. In repetitive  
153 regions, Pangenie matches GATK's 0.70 F-score, while the HMM workflow slightly trails at 0.69. The k-mer-based  
154 workflow struggles in these regions and scores 0.6 but is improved to 0.65 by the two-pass workflow. Overall, the  
155 Great Genotyper consistently demonstrates competitive genotyping accuracy compared to Pangenie across most  
156 scenarios, and it represents the most accurate option for genotyping unphased SVs with the two-pass workflow.

157 Sequencing depth impacts the genotyping accuracy, as depicted in Figure 2B2. Notably, all genotypers exhibit  
158 reduced accuracy at sequencing depths of 10x and 5x. Genotypers that incorporate phasing information, such as  
159 The Great Genotyper's HMM and two-pass workflows, as well as Pangenie, show the smallest decrease in accuracy.  
160 For instance, the accuracy of SV genotyping by The Great Genotyper's HMM and Pangenie at 5x coverage drops by  
161 8% and 9% in non-repetitive regions, and 7% and 5% in repetitive regions, respectively. The k-mer-based workflow  
162 experiences a decrease of 14% and 9%, which the two-pass model returns to 7% and 5% in non-repetitive and  
163 repetitive regions, respectively. Last, GraphTyper's accuracy diminishes by 12% and 22% in non-repetitive and  
164 repetitive regions, respectively.

165 The reduction in sequencing depth from 30x to 5x similarly affects the accuracy of small variant genotyping in  
166 both non-repetitive and repetitive regions. Pangenie exhibits the smallest accuracy decline, by 7% and 5%, followed  
167 by The Great Genotyper's HMM with 11% and 7%, and GATK with 8% and 17%. The k-mer-only model suffers a  
168 significant drop of 22% and 11%, but this is mitigated by the two-pass model to 10% and 7% in non-repetitive and  
169 repetitive regions, respectively.

### 170 **3.3 Facilitating Population Studies for Small and Structural Variants**

#### 171 **3.3.1 The Great Genotyper can help to find pathogenic variants**

172 Filtering common variants is a widely used strategy in disease association studies. ClinVar, a public database,  
173 catalogs genomic variations in humans and their impact on health [31]. As a proof of concept, the k-mer-based  
174 workflow is applied to genotype the ClinVar database variants in the 4k samples of the CCDG index. Consistent with  
175 expectations, almost all pathogenic variants exhibit zero allele frequency in this healthy population, whereas benign  
176 variants display a broader range of frequencies (Figure 3A). This demonstrates that calculating allele frequencies for  
177 a list of suspected variants in this indexed cohort is a reliable metric for prioritizing rare variants in studies of their  
178 pathogenic potential.

#### 179 **3.3.2 Generation of 4k reference panel by Genotyping HPRC Variants in 4K Samples**

180 The current HPRC pangenome comprises 88 haplotypes (Citation). As previously described [23], decomposing the  
181 pangenome yields a phased VCF containing 26.8 M variants (See Supplementary Table 1 for the summary count per  
182 variant type). The HMM workflow is used to genotype these variants in the prebuilt CCDG. The resulting output  
183 is a phased VCF of the HPRC variants in the indexed 4K samples, creating a new 4K reference panel. Principal  
184 Component Analysis (PCA) on the genetic variation within this 4k reference panel confirms the expected distribution  
185 of populations studied in the 1kGP, paving the way to generate cost-efficient similar panels for several other species  
186 (Figure 3B). Subsequent sections will explore how this panel can facilitate various genomic applications.

#### 187 **3.3.3 Impute SV by using the 4k reference panel**

188 Genotype imputation is a statistical method that predicts unobserved genotypes using reference sequences, thereby  
189 enhancing the density and scope of genetic analyses at reduced costs. This technique is especially valuable in  
190 increasing the power and consistency of genetic studies, including genome-wide association studies (GWAS) and  
191 fine-mapping efforts [37]. The 4k reference panel may replace the panel generated by the 1kGP project [21] while  
192 enabling the imputation of structural variants (SVs). In this section, we demonstrate the precision and recall of  
193 imputing both small and structural variants using the 4k reference panel. Initially, pseudo-microarray variant calls  
194 are generated using the HG002 sample from the Genome in a Bottle (GIAB) project [38] by extracting variants  
195 at sites used in the Illumina Infinium OmniExpress-24, simulating microarray genotyping. The 4k reference panel  
196 is then employed to impute both small and structural variants. For benchmarking purposes, the 1kGP reference  
197 panel is used exclusively for imputing small variants, with no similar panel available for SVs. Instead, SV calling  
198 from 30x SRS using Manta serves as an alternative. The output VCFs are compared against gold standard GIAB  
199 datasets using hap.py (v0.3.12) [39] for small variants, and truvari (v3.5.0) [63] for SVs. The 4k reference panel  
200 exhibits commendable precision and recall for the imputation of both types of variants, as depicted in figure 3D.  
201 When compared to the 1kG reference panel, it displayed some reduced precision compensated by an increase in recall  
202 for SNPs and indel imputation. Conversely, the 4k reference panel shows remarkable results in imputing common  
203 SVs, achieving an impressive recall of 86%. This imputation recall surpasses the recall of SV calling from 30x SRS  
204 using Manta. These results highlight how the 4k reference panel can be leveraged to augment microarray genotypes  
205 with common SVs.

#### 206 **3.3.4 Fine Mapping of GWAS SNPS using SVs from the 4k reference panel**

207 The 4k reference panel provides detailed insights into the structure of common haplotypes composed of small and  
208 structural variants. In particular, it allows the exploration of linkage disequilibrium (LD) between SVs and neigh-  
209 boring variants known to be associated with phenotypic changes. We initiate our investigation by annotating the  
210 SVs in the 4k reference panel using AnnotSV (v3.3.6) [40]. This reveals that approximately 463K SVs affect gene  
211 structures. Proceeding further, we compute the pairwise LD for each of these variants with all the variants located

212 within a 1MB window surrounding them. Our analysis indicates that 91K SVs exhibit a strong association with a  
213 neighboring variant, having an  $r^2$  value greater than 0.8.

214 We utilize the identified associations to illuminate potential causal variants in GWAS studies. Among the 91K  
215 SVs, 3,744 are found in strong linkage with GWAS SNPs. We compiled a table that includes these SVs, their  
216 annotations, associated GWAS SNPs, and other relevant metadata (see the 'Data and Code Availability' section).  
217 This table should be a valuable resource elucidating the phenotypic effects of common SVs and help pinpoint some  
218 causal variants of the traits examined in these GWAS studies. Figure 3E summarizes of the associations found in  
219 the table. Notably, 722 of these SVs impact the coding regions of genes, with 415 causing frameshift mutations.

220 We explore a specific example from our list in figure 3C, focusing on the Human fibrinogen locus on chromosome  
221 4. This 50-kilobase region includes three fibrinogen genes: the central FGA gene encodes the alpha chain, flanked by  
222 FGB and FGG encoding the beta and gamma chains, respectively [41]. Our reference panel shows an insertion of 28  
223 bp at chr4:154584089 (dbSNP: rs148317511; ClinVar: RCV000247066) in a high linkage ( $r^2=0.98$ ) with rs6050-C; a  
224 missense mutation in FGA associating with venous thromboembolism [42, 43, 44, 45, 44] and chronic thromboembolic  
225 pulmonary hypertension [45, 46]. The insertion is reported in ClinVar as a benign variant. Surprisingly, further  
226 digging in the literature shows that the variant was once known as the Taq I polymorphism because it created an  
227 additional restriction site for Taq I [47]. The allele was found to enhance the stability of FGA mRNA in vitro [43].  
228 This was explained by the ability of the insertion to oppose the suppressive effect of has-miR-759 on the 3 UTR of  
229 FGA [46]. These findings suggest that the ClinVar information on the variant should be revised.

230 Interestingly, our panel is able to capture the haplotype structure of the fibrinogen locus and shows how the 28bp  
231 insertion fits in. For example, rs6050 is known to be in high linkage with rs7681423; SNP upstream to FGG and a  
232 peak of association with  $\gamma'$  Fibrinogen. Both SNPs are known to have no significant association with total fibrinogen  
233 levels and no linkage with rs1800789; SNP in FGB shows the strongest association with total fibrinogen level, but not  
234 with  $\gamma'$  fibrinogen [48]. The panel confirms these relationships between the three SNPs and shows that the insertion  
235 allele has some linkages ( $r^2=76$ ) to rs7681423 and no linkage to rs1800789. Also, the panel shows a unique haplotype  
236 ( $r^2=96$ ) of the insertion and rs2070011-A; an allele of CFA's promoter causing higher expression of the gene. This  
237 haplotype is different from the haplotype of rs6050 and rs7681423.

## 238 4 Discussion

239 The Great Genotyper serves as a practical solution for population genotyping at massive scales. It provides the  
240 ability to genotype a new set of variants, whether small or structural, in thousands of SRS samples in just a matter  
241 of hours. More importantly, it provides a novel solution for the chronic N+1 problem by eliminating the need to  
242 download and process terabytes of raw sequencing data. Instead, the Great Genotyper operates using a prebuilt  
243 CCDG, effectively decoupling intensive data preprocessing from the actual genotyping process. In terms of input,  
244 the Great Genotyper is versatile; it accepts any set of phased or unphased variants, along with the reference genome.  
245 The outcome is the phased genotypes of all input variants in the indexed samples. In this manuscript, 183 TB of  
246 SRA files for 4K human SRS samples are indexed to generate an 867 GB CCDG to enable unprecedented efficiency  
247 in calculating allele frequencies of any list variants in the human population. As a proof of concept, the index is used  
248 to genotype the HPRC pangenome variants as an example for phased variants as well as genotyping all unphased  
249 ClinVar variants.

250 The Great Genotyper does not sacrifice quality for scalability. On the contrary, the scalability empowers the  
251 Great Genotyper to jointly genotype thousands of samples, which, in turn, enhances the genotyping quality even  
252 more. K-mer-based genotypers such as Nebula and Pangenie have previously demonstrated the potential of k-mers  
253 for precise genotyping. They leverage the specificity of variant-specific k-mers, using shifts in the counts of these  
254 k-mers as indicators to genotype the variants. The Great Genotyper reinforces this approach, considering the counts  
255 of these k-mers across an entire population of samples. This innovation facilitates the calculation of a confidence  
256 measure for each genotype based on the collective population data. Furthermore, the tool is equipped to impute

missed genotypes through a two-tiered approach. Initially, imputation is rooted in the phasing information of the variants, either provided as input or derived from the large cohort genotypes. Subsequently, the Great Genotyper integrates Beagle, leveraging the high-confidence genotypes within the population to further impute genotypes. This dual-phase imputation process ensures that the Great Genotyper can deliver performance on par with Pangenie, even if some data is compromised during the k-mer count preprocessing while indexing to enable better data compression as described in Supplementary Figure 7.

The enhanced accuracy and scalability of the Great Genotyper paves the way for valuable downstream applications in genomics. For instance, accurate allele frequencies can now be directly derived from sequences rather than merging information from sparse studies or variation databases that rely on variant calling in SRS studies. Such accurate determination of allele frequencies can play a pivotal role in pinpointing causal variants in disease-gene discovery studies. Furthermore, simultaneous genotyping and phasing of common variants enables dramatically improved resolution for understanding the haplotype structure within and across populations. As an example, genotyping the HPRC pangenome variants in 4k samples produces what we call “the 4k reference panel (4kRP)”. We show how the 4kRP can be used to impute common SVs with a recall rate that surpasses some short-read callers like Manta.

Taking our analysis further, we explore the 4kRP for SVs in high LD with known GWAS SNPs. We limit our focus to 91K SV variants impacting gene structures. Intriguingly, we discover that approximately half of these SVs exhibit strong associations with at least one GWAS SNP. We are optimistic that our findings will contribute to a deeper comprehension of the relationship between genotype and phenotype concerning these structural variants.

Although the Great Genotyper is effective in generating high-quality genotypes for both small and structural variants, it does have certain limitations. First, some variants cannot produce specific k-mers because the k-mers from the alternate sequences may also be present in other parts of the genome. Such variants cannot be genotyped precisely by k-mer-based approaches. This limitation, however, is partially offset through imputation. Furthermore, genotyping copy number variants is beyond the capabilities of the current version of the Great Genotyper. While it is not an insurmountable challenge, it requires development of a dedicated genotyping model. Another constraint is that the Great Genotyper utilizes two separate imputation models, as they are implemented in two distinct tools, Pangenie and Beagle. A unified model tailored specifically for imputing genotypes using the k-mers in the CCDG could both enhance the accuracy as well as boost performance.

The Great Genotyper opens many doors for future genomic applications. Creating more CCDGs to represent specific subpopulations or individuals exhibiting specific traits, like autism, is crucial for understanding the role of genomics in these cohorts. Moreover, while most population studies have been conducted on humans [49], this approach is applicable to many other organisms. The Sequence Read Archive (SRA) [50] is a vast reservoir of short-read samples for non-human organisms. Generating CCDGs for these samples will facilitate population-scale studies for other species.

The current CCDG for the human population, and the additional CCDGs to be created for other cohorts, are invaluable resources with potential applications that extend beyond genotyping. For instance, variants can be directly called from the graph using methods such as Corticall [51]. Additionally, it can aid in subsetting pangenomes by selecting segments of the pangenome that have k-mers present in a specific population, thereby creating a more streamlined pangenome tailored to that population. We encourage the community to explore and uncover more ways to harness the extensive genomic diversity revealed by the CCDG.

## 5 Conclusion

The Great Genotyper can transform population genotyping into a routine task using a flexible CCDG representation of populations. Its scalability allows the improvement of genotyping quality by using population information. The tool’s practicality aids in expanding variant lists into broader dimensions, revealing complex genomic details. We demonstrate its potential in applications such as creating SV imputation panels, finding SV associations with variants from databases like the GWAS catalog, and accurately calculating population allele frequencies. The CCDG, com-

302 prising 4,000 human samples, contains a vast genomic variation spectrum, accessible through The Great Genotyper  
303 or other methods, leading to enhanced genomic insights. Producing more CCDGs for additional cohorts or species  
304 will further optimize the use of existing SRS samples.

## 305 **6 Data and Code Availability**

306 The code for The Great Genotyper is publicly available on GitHub at the following URL: <https://github.com/dib-lab/TheGreatGenotyper>. The benchmarking code used in our study can also be found on GitHub at this URL:  
307 [https://github.com/dib-lab/TheGreatGenotyper\\_benchmark](https://github.com/dib-lab/TheGreatGenotyper_benchmark). The indexes used in our project are hosted on  
308 our server and can be accessed at this URL: [https://farm.cse.ucdavis.edu/~tahmed/GG\\_index/](https://farm.cse.ucdavis.edu/~tahmed/GG_index/). We have also  
309 provided several use cases which can be found at this URL: [https://github.com/dib-lab/TheGreatGenotyper\\_](https://github.com/dib-lab/TheGreatGenotyper_usecases)  
310 [usecases](https://github.com/dib-lab/TheGreatGenotyper_usecases). The genotyped pangenomes are available at this URL: [https://farm.cse.ucdavis.edu/~mshokrof/4k\\_](https://farm.cse.ucdavis.edu/~mshokrof/4k_reference_panel/)  
311 [reference\\_panel/](https://farm.cse.ucdavis.edu/~mshokrof/4k_reference_panel/). The LD list and the GWAS SV Associations can be found at this URL: [https://farm.cse.](https://farm.cse.ucdavis.edu/~mshokrof/GWAS_associations/)  
312 [ucdavis.edu/~mshokrof/GWAS\\_associations/](https://farm.cse.ucdavis.edu/~mshokrof/GWAS_associations/). Lastly, the ClinVar genotyped data can be accessed at this URL:  
313 [https://farm.cse.ucdavis.edu/~mshokrof/The\\_great\\_genotyper\\_clinvar/](https://farm.cse.ucdavis.edu/~mshokrof/The_great_genotyper_clinvar/).

## 315 **7 Methods**

### 316 **7.1 Short Read Samples Preprocessing and Clustering**

317 Upon the download of each sample, kmc [52] was used for k-mer counting with a minimum count of 3 to filter out  
318 singletons and doubletons, which are likely sequencing errors. In addition, Metagraph [62] was utilized to identify the  
319 unitigs and retain only the average k-mer count per unitig, thus smoothing k-mer counts. This smoothing reduced  
320 the size of the k-mer counts to one-tenth while maintaining high genotyping accuracy (see below). Subsequently,  
321 alignment-free quality control was done using Snipe [61]. In brief, a sourmash sketch was created for each sample  
322 using a k size of 51 and a subsampling scale of 10k, which entails keeping a single hash for every 10,000 k-mers.  
323 A similar sketch at the same scale was created for the GRCh38 reference genome. Intersection of both signatures  
324 enabled approximate estimation of the genome coverage and sequencing depth as well as sex confirmation (Supple-  
325 mentary Figures 2 and 3). Subsequently, kSpider [64] calculated pairwise similarities between all samples based on  
326 their sourmash sketches. To alleviate skew from the sex chromosomes, the sketch of chrY was subtracted from all  
327 samples. Hierarchical clustering was employed using the Scipy library [65] to construct a dendrogram visualized in  
328 Supplementary Figure 6 by iTOL [53]. From the dendrogram, twenty-nine clusters were extracted and subsequently  
329 refined manually to ensure each encompasses between 100-350 samples.

### 330 **7.2 Determining The Best Indexing Parameters**

331 We investigated the influence of sample preprocessing on genotyping accuracy to determine the best parameters for  
332 optimal results. Multiple CCDGs were generated from sub-samples of the HG00731 SRS at sequencing depths of  
333 5x, 10x, 20x, and 30x. Each CCDG was constructed using a different set of parameters, which are summarized  
334 in Supplementary Table 2, along with the final sizes of the CCDGs. Benchmarking was done as described in  
335 Supplementary Figure 4 and later in the methods.

336 Results in Supplementary Figure 7 and Table 2 indicate that preprocessing methods do not impact samples  
337 with coverage exceeding 20x. For coverages of 10x and 5x, logging the counts is the most influential, significantly  
338 decreasing both the F-score and the final CCDG size. On the other hand, smoothing leads to a nominal drop in the  
339 F-score but notably reduces the CCDG size. Cleaning had a moderate impact on the F-score and caused a slight  
340 reduction in the CCDG size. These findings are instrumental in guiding our final decision to use smoothing of k-mer  
341 counts as the only preprocessing for input samples.



### 342 7.3 Genotyping Workflow

343 The Great Genotyper adopts the genotyping model from Pangenie [17] to implement two genotyping workflows;  
344 one for genotyping unphased variants using k-mer counts, and another for genotyping and imputing phased variants  
345 using k-mer counts and phasing information. For the phased variants, the Great Genotyper employs the Pangenie  
346 HMM model, which is based on the Li-Stephen model [54]. For the unphased variants, we rely solely on emission  
347 probabilities to determine the most probable genotype for each variant. The genotyping models yield a confidence  
348 measure for the output genotypes, deducing the likelihoods of all possible genotypes and selecting the one with the  
349 highest probability. The confidence level is derived from the difference between the highest probability and the other  
350 probabilities. Therefore, a larger difference correlates to higher confidence.

351 The components driving these confidence probabilities can primarily be distilled into two factors: the number of  
352 unique k-mers discovered for each variant haplotype and the count of these k-mers in the sample. The first factor is  
353 a constant across all samples since it is determined only from the reference genome and the variant to be genotyped.  
354 However, the second factor varies per sample. Some samples may present robust evidence for a particular genotype,  
355 while others may not due to either low coverage of the region in the sample or the exhibition of a different haplotype  
356 not present in the input haplotypes. The Great Genotyper leverages the power of having a large population in  
357 the CCDGS to filter low-quality genotypes. In this step, the median of genotype confidences is calculated for each  
358 genotype then the genotypes falling below this median are discarded. This approach allows the Great Genotyper  
359 to establish a variable threshold calculated using the results from all the samples, providing a balanced way to sift  
360 through the variants. For variants abundant in unique k-mers, this threshold will be high, while more challenging  
361 variants will have a lower threshold, accommodating the varying levels of confidence in different scenarios. The final  
362 output of this step is a reference panel comprised of the high-confidence genotypes.

363 Finally, Beagle [35, 36] is employed to statistically impute the filtered, low confidence genotypes using this  
364 reference panel, simultaneously phasing the resultant variants, thereby yielding phased genotypes for all samples.  
365 It is crucial to note that Beagle employs a different HMM model, albeit very similar to the one used in the HMM  
366 workflow. In Beagle, linkage disequilibrium is computed statistically from the high-confidence genotypes within the  
367 created reference panel. In contrast, the model in the HMM workflow utilizes the phasing information provided by  
368 the user in the input variants. The synergy between these two imputation methods does not only enhance the results  
369 of genotyping but also broadens the application scope for the higher quality HMM model, enabling its usage when  
370 phasing information is absent in the input VCF, as described in the two-pass workflow in Figure 1B.

### 371 7.4 Benchmark Experiment Design

372 This section outlines the experimental design for the benchmarking experiments conducted to compare the accuracy  
373 of The Great Genotyper with the state-of-the-art genotyping tools: Pangenie, GraphTyper2, Paragraph, and GATK  
374 as described previously [17]. This experiment is structured into two components. The first component involves  
375 creating a truth variant set and a query variant set.

376 The truth set comprised of small and structural variants is created by aligning each haplotype-resolved assembly  
377 of HG00731 against the reference genome using minimap2 [55] and identifying the variants using PAV tools [56].  
378 The resulting two VCFs are merged using bcftools [57]. The analysis is confined to a confidence region on the  
379 reference genome, ensuring that only one segment from the assembly maps to it to avert the regions difficult to  
380 assemble. Variants within this confidence region are deemed suitable to represent the full truth in these regions.  
381 Similarly, the query VCF is created from the haplotype-resolved assemblies of NA12878 downloaded from GIAB  
382 [58]. The shared variants between the truth and query sets are categorized as true positives while those found only  
383 in the query set as true negatives.

384 The second component is running the genotypers and benchmarking them. Subsequently, different genotypers  
385 are executed on the query variants obtained from NA12878 and the SRS from the HG00731 sample. The genotyping  
386 results are then compared against the truth set. The benchmarking outcomes are stratified based on whether the

387 variant is located in a repeat region or not and are also classified by type and size: SNP, Indel(< 50bp), Inser-  
388 tions/deletions( > 50bp), and complex Insertions/Deletions, where “complex” denotes that the variation generates  
389 more than one breakpoint.

## 390 8 Author Contributions

391 M.S. and T.M. conceptualized the study, interpreted the results, and wrote the main draft. M.S. was responsible  
392 for the implementation of the software. T.M. supervised the work and participated in the data analysis. M.A.  
393 contributed to the experiment on reference-free QC. T.B. provided valuable feedback on the study design and  
394 reviewed the manuscript.

## 395 References

- 396 [1] Lewin, H. A. *et al.* Earth BioGenome Project: Sequencing life for the future of life **115**, 4325–4333. URL  
397 <https://www.pnas.org/doi/10.1073/pnas.1720115115>.
- 398 [2] Koepfli, K.-P. & Paten, B. The Genome 10K Project: A Way Forward **3**, 57–111. URL <https://doi.org/10.1146/annurev-animal-090414-014900>. 25689317.
- 400 [3] Quan, C. *et al.* Characterization of structural variation in Tibetans reveals new evidence of high-altitude  
401 adaptation and introgression **22**, 159. URL <https://doi.org/10.1186/s13059-021-02382-3>.
- 402 [4] Fujinami, K. *et al.* Detailed genetic characteristics of an international large cohort of patients with Stargardt  
403 disease: ProgStar study report **8 103**, 390–397. 29925512.
- 404 [5] Mostafavi, H. *et al.* Identifying genetic variants that affect viability in large cohorts **15**, e2002458. URL  
405 <https://journals.plos.org/plosbiology/article?id=10.1371/journal.pbio.2002458>.
- 406 [6] Pang, A. W. *et al.* Towards a comprehensive structural variation map of an individual human genome **11**, R52.  
407 URL <https://doi.org/10.1186/gb-2010-11-5-r52>.
- 408 [7] Chiang, C. *et al.* The impact of structural variation on human gene expression **49**, 692–699. URL <https://www.nature.com/articles/ng.3834>.
- 410 [8] Mahmoud, M. *et al.* Structural variant calling: The long and the short of it **20**, 246. URL <https://genomebiology.biomedcentral.com/articles/10.1186/s13059-019-1828-7>.
- 412 [9] Sedlazeck, F. J. *et al.* Accurate detection of complex structural variations using single-molecule sequencing **15**,  
413 461–468. URL [/pmc/articles/PMC5990442/?report=abstract](https://pmc/articles/PMC5990442/?report=abstract). 29713083.
- 414 [10] Cleal, K. & Baird, D. M. Dysgu: Efficient structural variant calling using short or long reads **50**, e53. URL  
415 <https://www.ncbi.nlm.nih.gov/pmc/articles/PMC9122538/>. 35100420.
- 416 [11] Mahmoud, M., Doddapaneni, H., Timp, W. & Sedlazeck, F. J. PRINCESS: Comprehensive detection of haplo-  
417 type resolved SNVs, SVs, and methylation **22**, 268. URL <https://doi.org/10.1186/s13059-021-02486-w>.
- 418 [12] Cheng, H., Concepcion, G. T., Feng, X., Zhang, H. & Li, H. Haplotype-resolved de novo assembly using phased  
419 assembly graphs with hifiasm **18**, 170–175. URL <https://www.nature.com/articles/s41592-020-01056-5>.
- 420 [13] Khorsand, P. & Hormozdiari, F. Nebula: Ultra-efficient mapping-free structural variant genotyper **49**, e47. URL  
421 <https://doi.org/10.1093/nar/gkab025>.

- 422 [14] Chen, S. *et al.* Paragraph: A graph-based structural variant genotyper for short-read sequence data **20**,  
423 31856913.
- 424 [15] Jun, G. *et al.* muCNV: Genotyping structural variants for population-level sequencing **37**, 2055–2057. URL  
425 <https://doi.org/10.1093/bioinformatics/btab199>.
- 426 [16] Eggertsson, H. P. *et al.* GraphTyper2 enables population-scale genotyping of structural variation using  
427 pangenome graphs **10**, 1–8. URL <https://doi.org/10.1038/s41467-019-13341-9>. 31776332.
- 428 [17] Ebler, J. *et al.* Pangenome-based genome inference allows efficient and accurate genotyping across a wide  
429 spectrum of variant classes **54**, 518–525. URL <https://www.nature.com/articles/s41588-022-01043-w>.
- 430 [18] Huddleston, J. *et al.* Discovery and genotyping of structural variation from long-read haploid genome sequence  
431 data **27**, 677–685. URL <https://genome.cshlp.org/content/27/5/677>. 27895111.
- 432 [19] Quan, C., Lu, H., Lu, Y. & Zhou, G. Population-scale genotyping of structural variation in the era  
433 of long-read sequencing **20**, 2639–2647. URL <https://www.sciencedirect.com/science/article/pii/S2001037022002033>.  
434
- 435 [20] Kirsche, M. *et al.* Jasmine and Iris: Population-scale structural variant comparison and analysis **20**, 408–417.  
436 URL <https://www.nature.com/articles/s41592-022-01753-3>.
- 437 [21] 1000 Genomes Project Consortium *et al.* A global reference for human genetic variation **526**, 68–74. 26432245.
- 438 [22] Meadows, J. R. S. *et al.* Genome sequencing of 2000 canids by the Dog10K consortium advances the un-  
439 derstanding of demography, genome function and architecture **24**, 187. URL <https://doi.org/10.1186/s13059-023-03023-7>.  
440
- 441 [23] Liao, W.-W. *et al.* A draft human pangenome reference **617**, 312–324. URL [https://www.nature.com/](https://www.nature.com/articles/s41586-023-05896-x)  
442 [articles/s41586-023-05896-x](https://www.nature.com/articles/s41586-023-05896-x).
- 443 [24] Gao, Y. *et al.* A pangenome reference of 36 Chinese populations **619**, 112–121. URL [https://www.nature.](https://www.nature.com/articles/s41586-023-06173-7)  
444 [com/articles/s41586-023-06173-7](https://www.nature.com/articles/s41586-023-06173-7).
- 445 [25] Dai, X. *et al.* A Chinese indicine pangenome reveals a wealth of novel structural variants introgressed from  
446 other Bos species **33**, 1284–1298. URL <https://genome.cshlp.org/content/33/8/1284>. 37714713.
- 447 [26] Zhou, Y. *et al.* Assembly of a pangenome for global cattle reveals missing sequences and novel structural  
448 variations, providing new insights into their diversity and evolutionary history **32**, 1585–1601. URL <https://genome.cshlp.org/content/32/8/1585>. 35977842.  
449
- 450 [27] Li, R. *et al.* A sheep pangenome reveals the spectrum of structural variations and their effects on tail phenotypes  
451 **33**, 463–477. URL <https://genome.cshlp.org/content/33/3/463>. 37310928.
- 452 [28] Huang, Y. *et al.* Pangenome analysis provides insight into the evolution of the orange subfamily and a key gene for  
453 citric acid accumulation in citrus fruits 1–12. URL <https://www.nature.com/articles/s41588-023-01516-6>.
- 454 [29] Lappalainen, I. *et al.* DbVar and DGVa: Public archives for genomic structural variation **41**.
- 455 [30] Taliun, D. *et al.* Sequencing of 53,831 diverse genomes from the NHLBI TOPMed Program **590**, 290–299. URL  
456 <https://www.nature.com/articles/s41586-021-03205-y>.
- 457 [31] Landrum, M. J. *et al.* ClinVar: Public archive of relationships among sequence variation and human phenotype  
458 **42**, D980–D985. URL <https://www.ncbi.nlm.nih.gov/pmc/articles/PMC3965032/>. 24234437.

- 459 [32] Mastroianni, F. K., Miller, D. E. & Eichler, E. E. Applications of long-read sequencing to Mendelian genetics  
460 **15**, 42. URL <https://doi.org/10.1186/s13073-023-01194-3>.
- 461 [33] Bergström, A. *et al.* Insights into human genetic variation and population history from 929 diverse genomes  
462 **367**, eaay5012. URL <https://www.science.org/doi/10.1126/science.aay5012>.
- 463 [34] Mallick, S. *et al.* The Simons Genome Diversity Project: 300 genomes from 142 diverse populations **538**,  
464 201–206. URL <https://www.nature.com/articles/nature18964>.
- 465 [35] Browning, B. L., Zhou, Y. & Browning, S. R. A One-Penny Imputed Genome from Next-Generation Reference  
466 Panels **103**, 338–348. URL [https://www.cell.com/ajhg/abstract/S0002-9297\(18\)30242-8](https://www.cell.com/ajhg/abstract/S0002-9297(18)30242-8). 30100085.
- 467 [36] Browning, B. L., Tian, X., Zhou, Y. & Browning, S. R. Fast two-stage phasing of large-scale sequence data **108**,  
468 1880–1890. URL [https://www.cell.com/ajhg/abstract/S0002-9297\(21\)00304-9](https://www.cell.com/ajhg/abstract/S0002-9297(21)00304-9). 34478634.
- 469 [37] Wang, Q. S. & Huang, H. Methods for statistical fine-mapping and their applications to auto-immune diseases  
470 **44**, 101–113. URL <https://www.ncbi.nlm.nih.gov/pmc/articles/PMC8837575/>. 35041074.
- 471 [38] Zook, J. M. *et al.* A robust benchmark for detection of germline large deletions and insertions **38**, 1347–1355.  
472 URL <https://www.nature.com/articles/s41587-020-0538-8>.
- 473 [39] Krusche, P. *et al.* Best practices for benchmarking germline small-variant calls in human genomes **37**, 555–560.  
474 URL <https://www.nature.com/articles/s41587-019-0054-x>.
- 475 [40] Geoffroy, V. *et al.* AnnotSV: An integrated tool for structural variations annotation **34**, 3572–3574. URL  
476 <https://doi.org/10.1093/bioinformatics/bty304>.
- 477 [41] Kant, J. A. *et al.* Evolution and organization of the fibrinogen locus on chromosome 4: Gene duplication  
478 accompanied by transposition and inversion **82**, 2344–2348. 2986113.
- 479 [42] Carter, A. M. *et al.* Alpha-fibrinogen Thr312Ala polymorphism and venous thromboembolism **96**, 1177–1179.  
480 10910940.
- 481 [43] Ko, Y.-L. *et al.* Functional polymorphisms of FGA, encoding alpha fibrinogen, are associated with susceptibility  
482 to venous thromboembolism in a Taiwanese population **119**, 84–91. 16362348.
- 483 [44] Rasmussen-Torvik, L. J. *et al.* The association of alpha-fibrinogen Thr312Ala polymorphism and venous throm-  
484 boembolism in the LITE study **121**, 1–7. 17433418.
- 485 [45] Le Gal, G. *et al.* Fibrinogen Aalpha-Thr312Ala and factor XIII-A Val34Leu polymorphisms in idiopathic venous  
486 thromboembolism **121**, 333–338. 17568659.
- 487 [46] Chen, Z. *et al.* Susceptibility to chronic thromboembolic pulmonary hypertension may be conferred by miR-759  
488 via its targeted interaction with polymorphic fibrinogen alpha gene **128**, 443–452. 20677013.
- 489 [47] Remijn, J. A., van Wijk, R., de Groot, P. G. & van Solinge, W. W. Nature of the fibrinogen  $\alpha\alpha$  gene taqi  
490 polymorphism. *Thrombosis and Haemostasis* **86**, 935 – 936 (2001). URL [https://api.semanticscholar.org/](https://api.semanticscholar.org/CorpusID:257235398)  
491 [CorpusID:257235398](https://api.semanticscholar.org/CorpusID:257235398).
- 492 [48] Lovely, R. S. *et al.* Assessment of genetic determinants of the association of  $\gamma'$  fibrinogen in relation to cardio-  
493 vascular disease **31**, 2345–2352. 21757653.
- 494 [49] Pokrovac, I. & Pezer, Z. Recent advances and current challenges in population genomics of structural variation  
495 in animals and plants **13**. URL <https://www.frontiersin.org/articles/10.3389/fgene.2022.1060898>.

- 496 [50] Leinonen, R., Sugawara, H. & Shumway, M. The Sequence Read Archive **39**, D19–D21. URL <https://www.ncbi.nlm.nih.gov/pmc/articles/PMC3013647/>. 21062823.
- 497
- 498 [51] Garimella, K. V. *et al.* Detection of simple and complex de novo mutations with multiple reference sequences **30**, 1154–1169. URL <https://genome.cshlp.org/content/30/8/1154.full>. 32817236.
- 499
- 500 [52] Kokot, M., Dlugosz, M. & Deorowicz, S. KMC 3: Counting and manipulating k-mer statistics **33**, 2759–2761. URL <http://sun.aei.polsl.pl/REFRESH/kmc>. 28472236.
- 501
- 502 [53] Letunic, I. & Bork, P. Interactive Tree Of Life (iTOL) v5: An online tool for phylogenetic tree display and annotation **49**, W293–W296. URL <https://doi.org/10.1093/nar/gkab301>.
- 503
- 504 [54] Li, N. & Stephens, M. Modeling Linkage Disequilibrium and Identifying Recombination Hotspots Using Single-Nucleotide Polymorphism Data **165**, 2213–2233. URL <https://doi.org/10.1093/genetics/165.4.2213>.
- 505
- 506 [55] Li, H. Minimap2: Pairwise alignment for nucleotide sequences **34**, 3094–3100. URL <https://github.com/ruanjue/smarddenovo>; .29750242.
- 507
- 508 [56] Ebert, P. *et al.* Haplotype-resolved diverse human genomes and integrated analysis of structural variation **372**, eabf7117. URL <https://www.science.org/doi/10.1126/science.abf7117>.
- 509
- 510 [57] Danecek, P. *et al.* Twelve years of SAMtools and BCFtools **10**, giab008. URL <https://doi.org/10.1093/gigascience/giab008>.
- 511
- 512 [58] Zook, J. M. & Salit, M. Genomes in a bottle: Creating standard reference materials for genomic variation—why, what and how? **12**. URL <https://doi.org/10.1186/gb-2011-12-s1-p31>.
- 513
- 514 [59] Jun, G. *et al.* Structural variation across 138,134 samples in the TOPMed consortium. URL <https://www.biorxiv.org/content/10.1101/2023.01.25.525428v1>.
- 515
- 516 [60] Chen, S. *et al.* A genome-wide mutational constraint map quantified from variation in 76,156 human genomes. URL <https://www.biorxiv.org/content/10.1101/2022.03.20.485034v2>.
- 517
- 518 [61] Abuelanin, M. & Mansour, T. Snipe. URL <https://zenodo.org/records/11170191>.
- 519
- 520 [62] Karasikov, M. *et al.* MetaGraph: Indexing and Analysing Nucleotide Archives at Petabase-scale. URL <https://www.biorxiv.org/content/10.1101/2020.10.01.322164v2>.
- 521
- 522 [63] English, A. C., Menon, V. K., Gibbs, R., Metcalf, G. A. & Sedlazeck, F. J. Truvari: Refined Structural Variant Comparison Preserves Allelic Diversity. URL <https://www.biorxiv.org/content/10.1101/2022.02.21.481353v1>.
- 523
- 524 [64] kSpider. URL <https://dib-lab.github.io/kSpider/>.
- 525
- 526 [65] SciPy documentation — SciPy v1.11.3 Manual. URL <https://docs.scipy.org/doc/scipy/index.html>.
- 527
- 528 [66] Brown, C. T. & Irber, L. Sourmash: A library for MinHash sketching of DNA **1**, 27. URL <https://joss.theoj.org/papers/10.21105/joss.00027>.
- [67] Bauer, C. & King, G. *Java Persistence with Hibernate* (Manning Publications Co.).

## A) Indexing Workflow

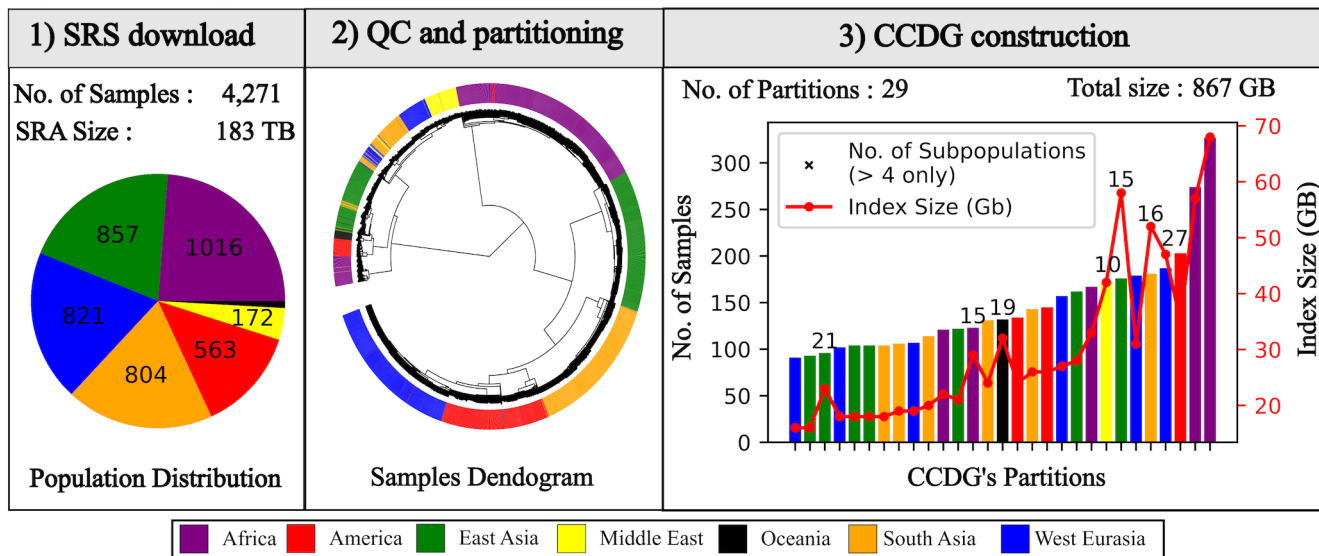

## B) Population Genotyping Workflow

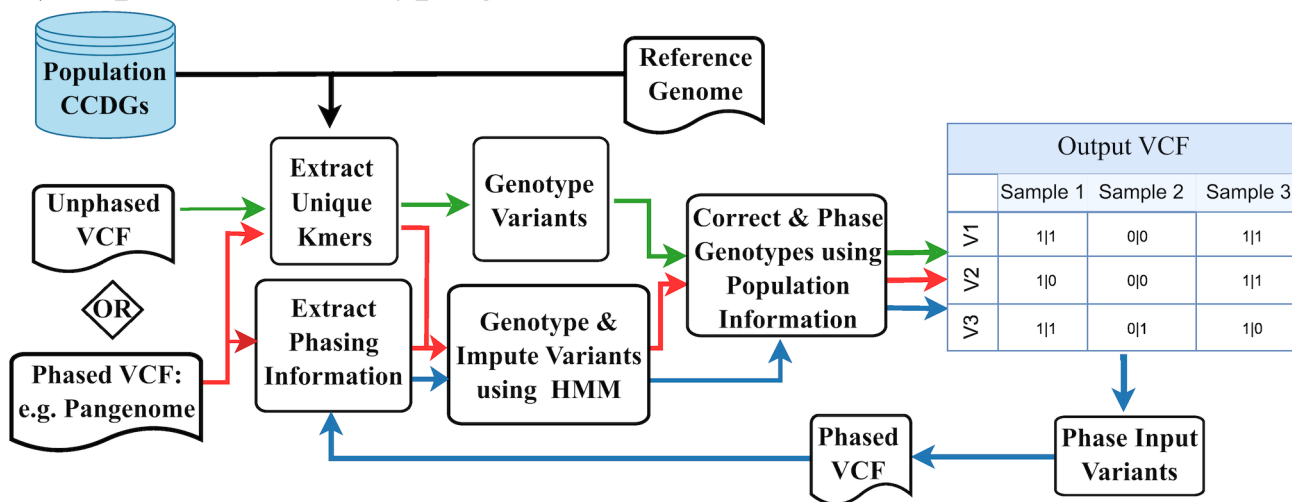

Figure 1: **The Great Genotyper workflows** The indexing workflow (A) depicts the high-level pipeline for creating Population CCDGs. The workflow downloads and computes the unitigs of each sample individually (A1). A sourmash signature is calculated for each sample to be used for alignment-free quality control and sample partitioning (A2). Lastly, a subgraph is created for each partition of samples (A3). The genotyping workflow (B) describes three population genotyping workflows illustrated with a different color of arrows: The HMM workflow (red) genotypes and imputes phased variants using a high-quality HMM model, the k-mer-based workflow (green) rapidly genotypes unphased variants, and the two-pass workflow (blue) enhances the recall of the k-mer-based workflow by genotyping its output phased variants using the HMM workflow.

## A) Performance

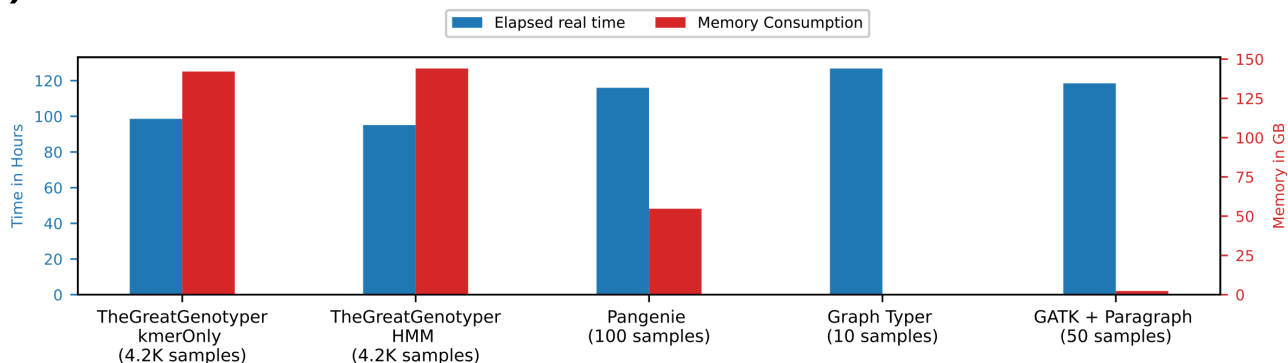

## B) Accuracy

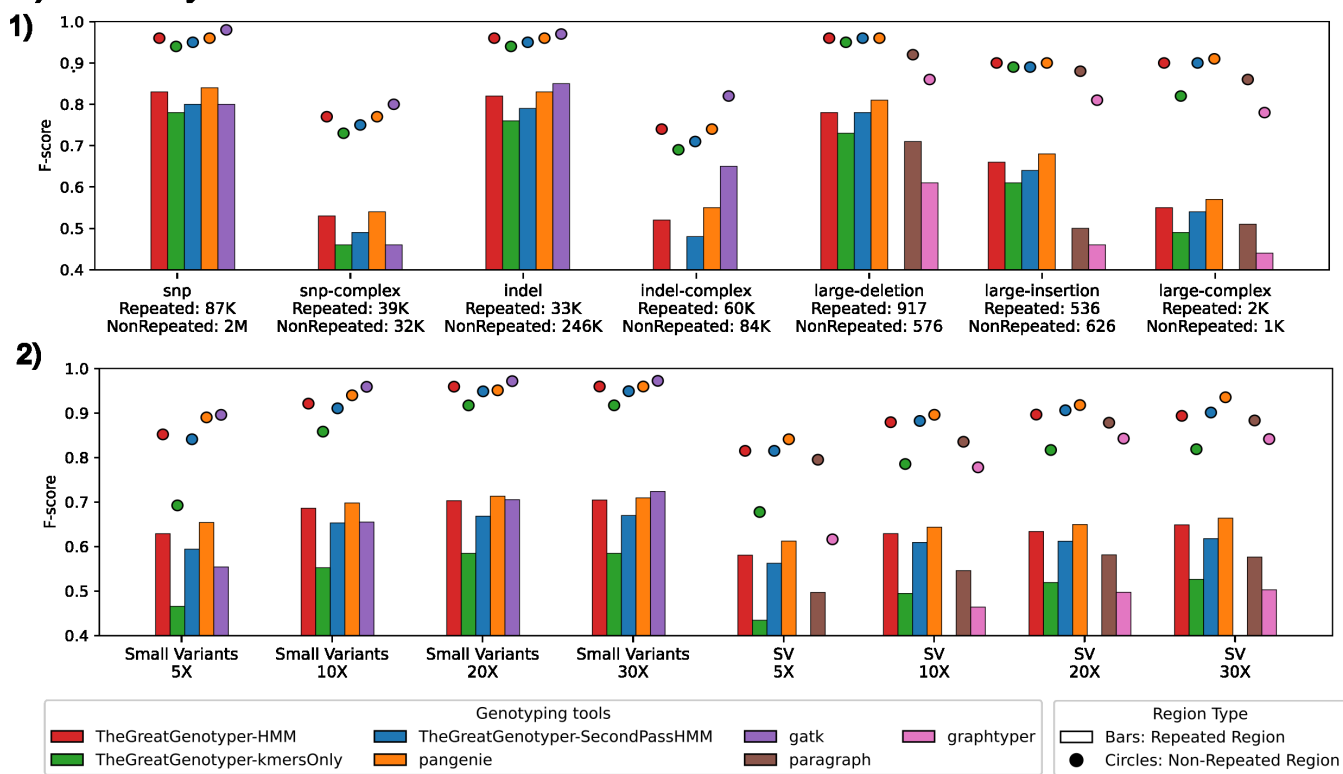

Figure 2: **The Great Genotyper provides unparalleled performance compared to the state of the art, with no compromise on accuracy.** Panel A shows the running time and memory usage of different tools used to genotype 4.5 million phased variants (including structural variants and small variants). The Great Genotyper is currently genotyping 4,200 samples at 30x coverage, while the other genotypers are handling 10 to 100 samples. Panel B1 illustrates the F-scores of different genotyping methods for different classes of variants. Panel B2 illustrates the effect of coverage on the F-scores of different genotyping methods for small and structural variants. In both Panels B1 and B2, the variants are categorized based on the complexity of the genomic loci into variants located in repeated (shown as bars) and non-repeated regions (shown as circles)

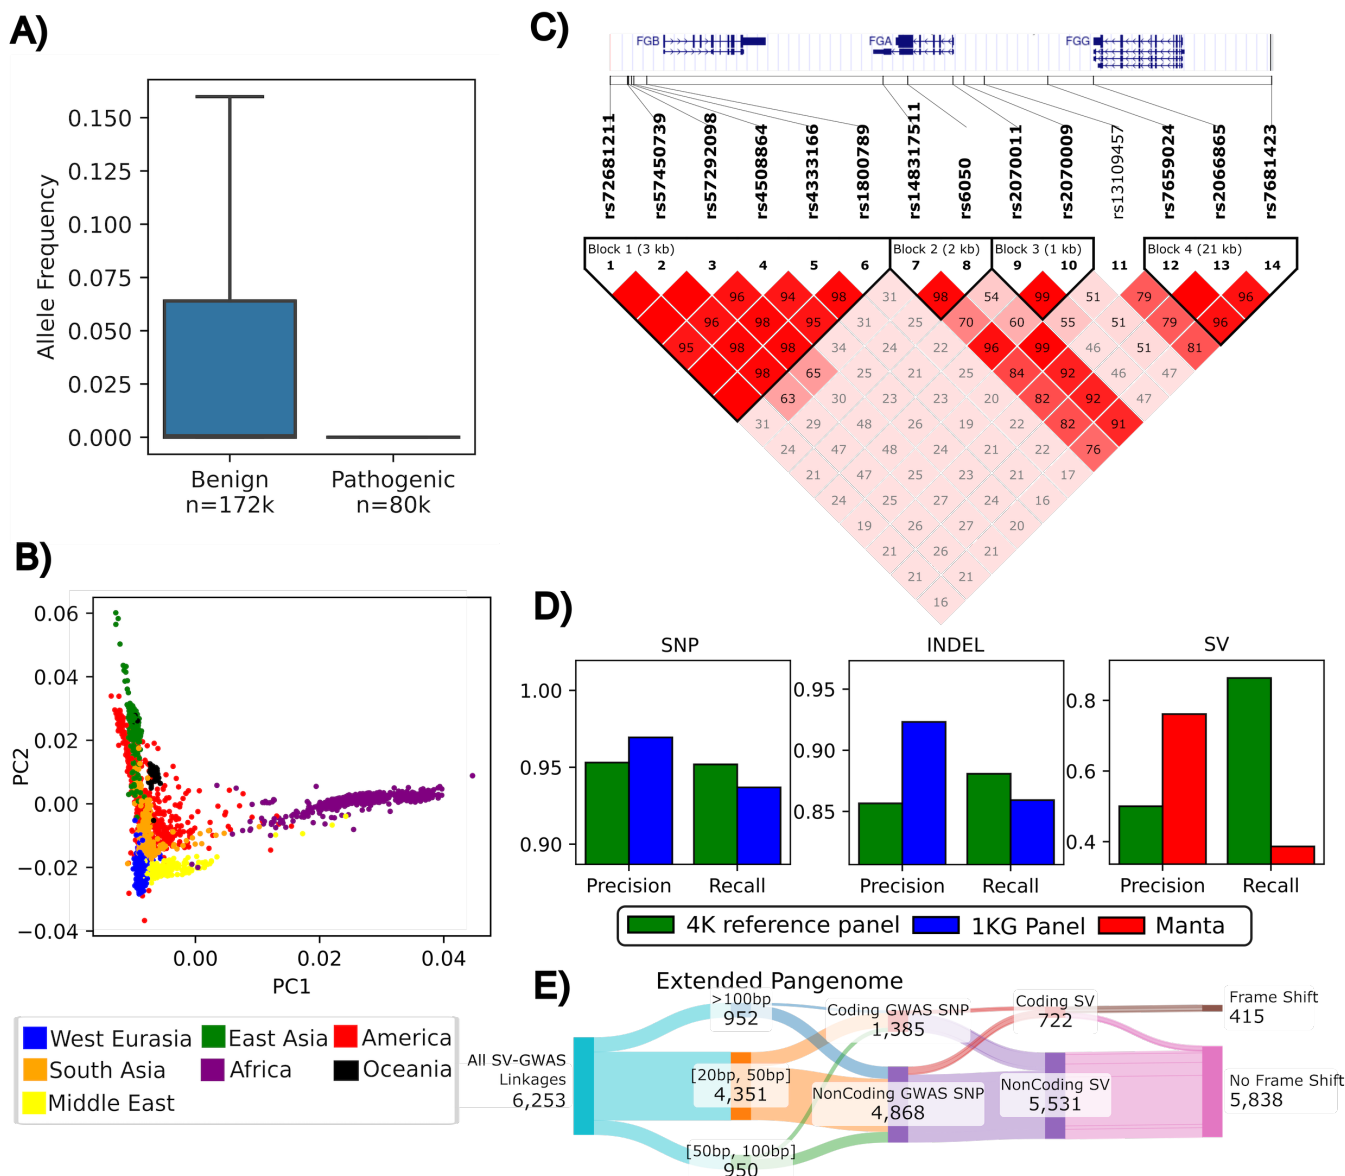

**Figure 3: Applications of The Great Genotyper:** We used the Great Genotyper to genotype all ClinVar and HPRC pangenome variants in 4k human samples. **Panel A** is a box plot of the distinctive distributions of population allele frequencies for ClinVar variants when stratified by the pathogenicity of the variants (outliers are not displayed). **Panel B** is a plot of the first two principal components from a PCA for the genotypes of the HPRC pangenome variants; the 4k samples are colored by their ancestry. **Panel C** is an LD heatmap that highlights the associations of an insertion (dbSNP: rs148317511) and multiple GWAS SNPs including rs6050-C; a peak associating SNP in a GWAS study of the circulating fibrinogen. **Panel D** shows the precision and recall of small and structural variant imputation using the 4k reference panel in comparison to small variant imputation using the 1000 Genome panel and calling SVs using Manta. **Panel E** presents a Sankey plot summarizing 6.2K linkage associations between SVs from the HPRC pangenome and the GWAS catalog. The columns stratify linkages based on various traits of both SVs and GWAS: SV size, GWAS SNP impact on coding regions, SV impact on coding regions, and SV-induced frameshifts.
